# Supplementary material
Source: PubMed Central journal article supplement (PMC1783089)

**A** Behavioral choice sensitivity

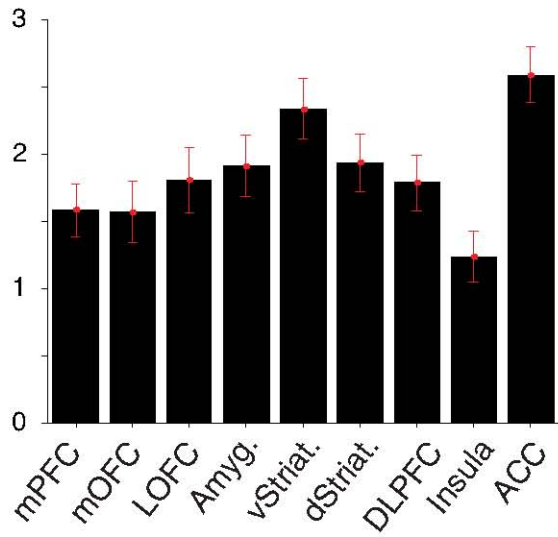

**B** Main effect of outcome sensitivity

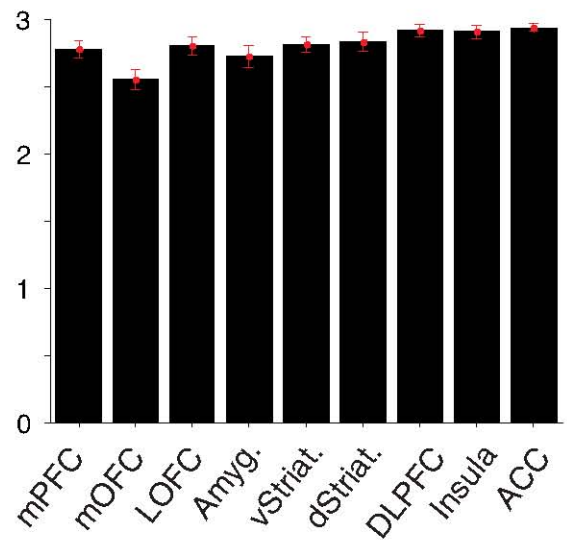

**C** Behavioral choice discriminability

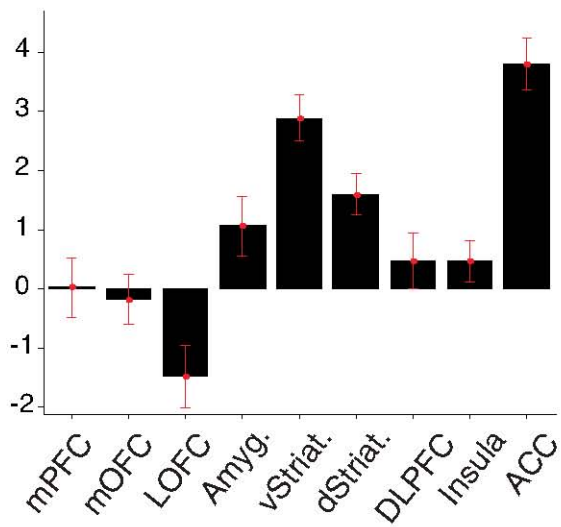

**D** Main effect of outcome discriminability

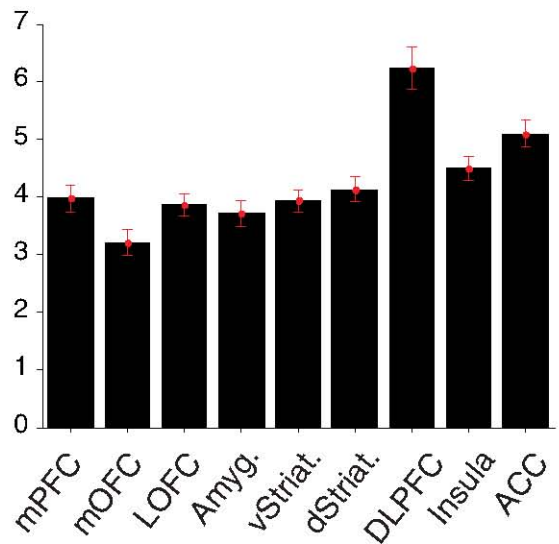

Supplement: pnas_0606297104_1.pdf [file pnas_0606297104_1.pdf]
