# Supplementary material
Source: PubMed Central journal article supplement (PMC1783089)

Medial PFC

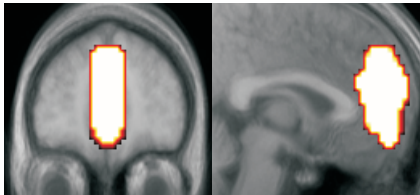

Amygdala

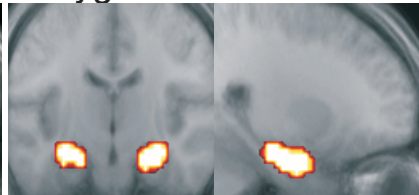

Dorso Lateral PFC

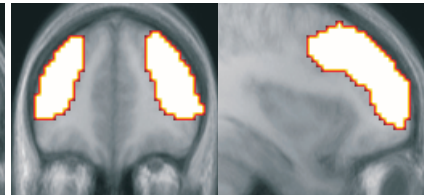

Medial OFC

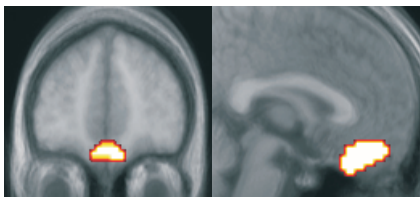

Ventral Striatum

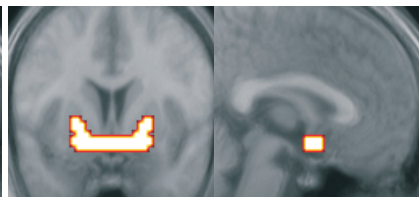

Frontal Insula

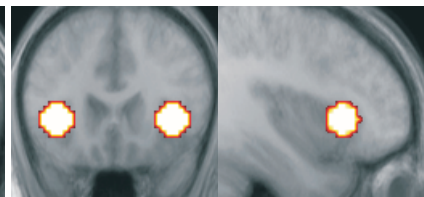

Lateral OFC

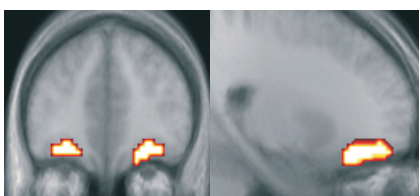

Dorsal Striatum

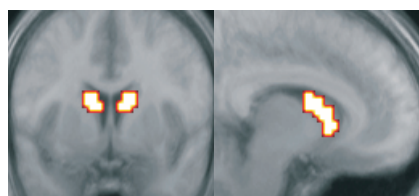

ACC

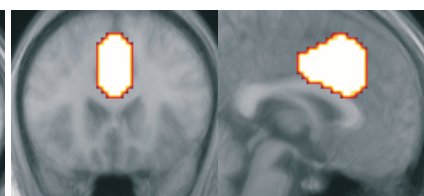

Supplement: pnas_0606297104_6.pdf [file pnas_0606297104_6.pdf]
