# Supplementary material
Source: PubMed Central journal article supplement (PMC1783089)

# Normalized Cross Correlation

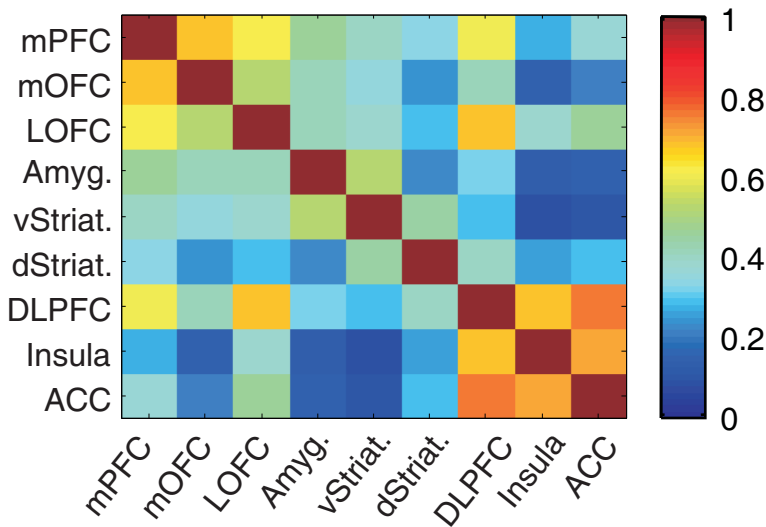

Supplement: pnas_0606297104_2.pdf [file pnas_0606297104_2.pdf]

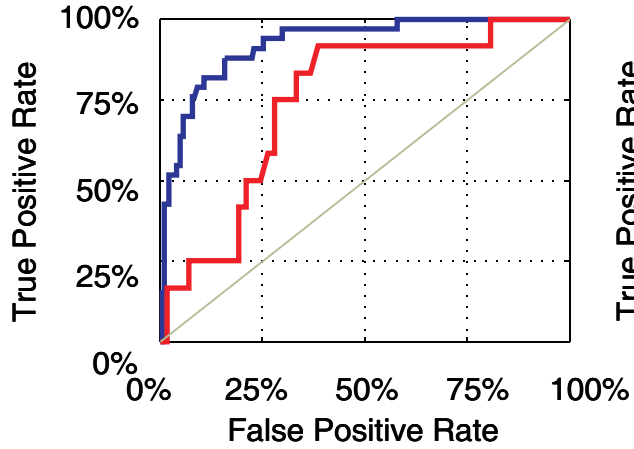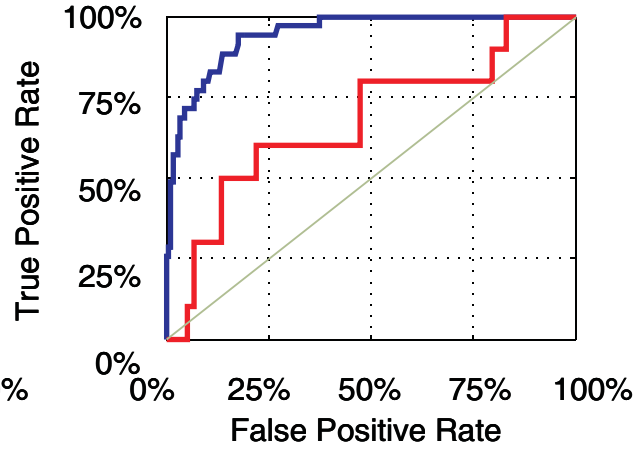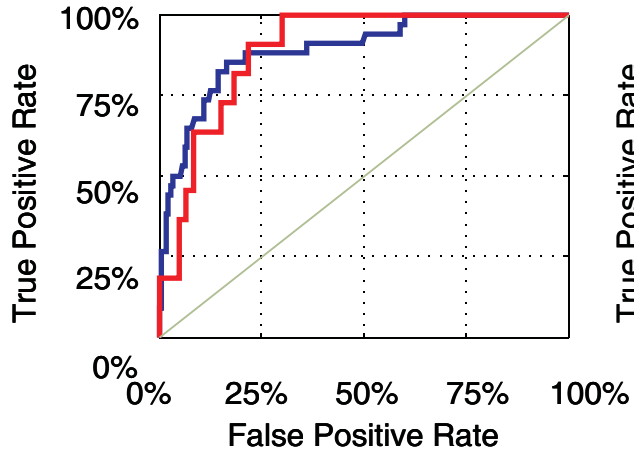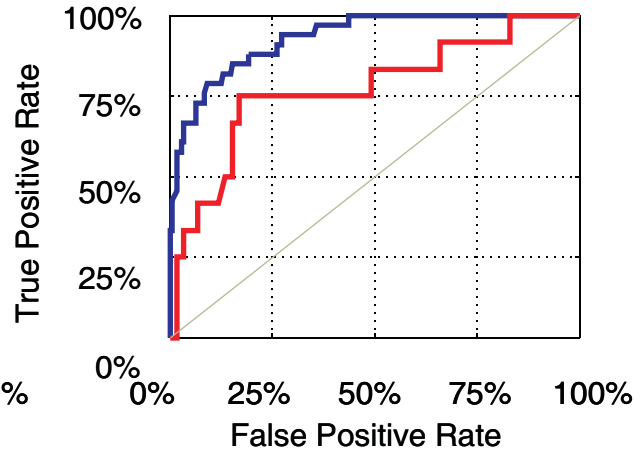

Supplement: pnas_0606297104_3.pdf [file pnas_0606297104_3.pdf]

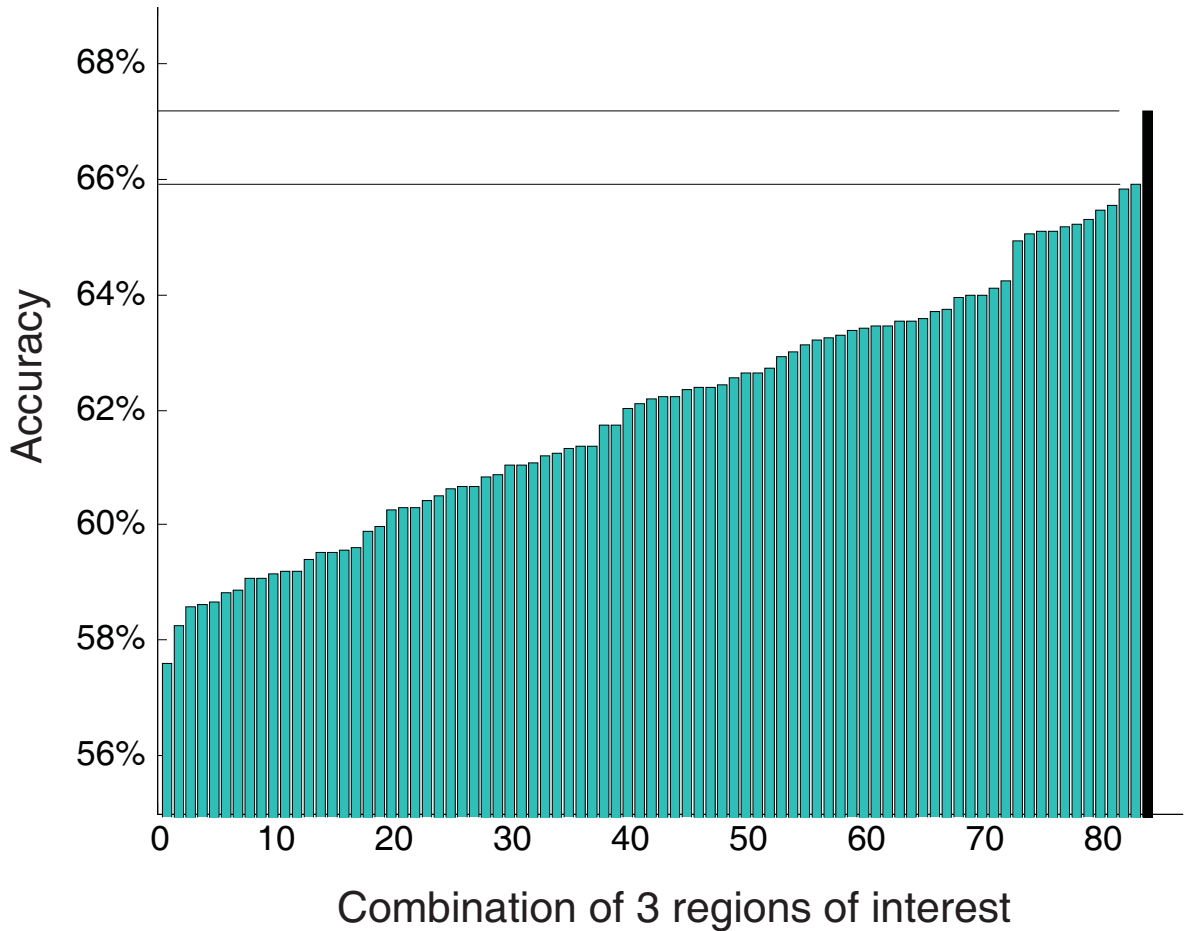

Supplement: pnas_0606297104_4.pdf [file pnas_0606297104_4.pdf]

Accuracy

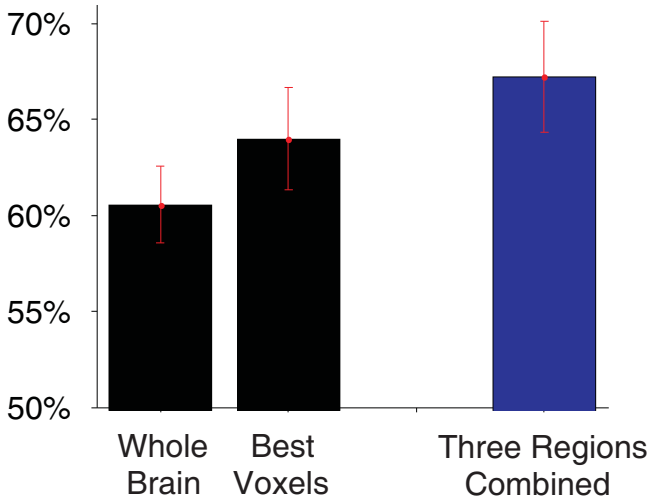

Supplement: pnas_0606297104_5.pdf [file pnas_0606297104_5.pdf]

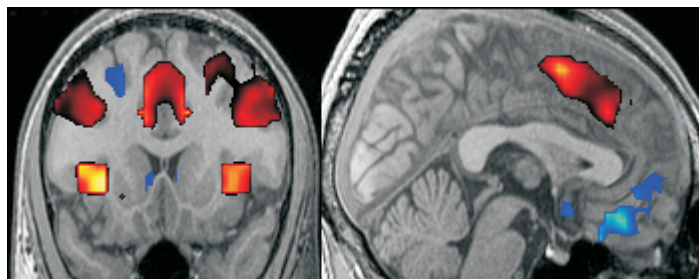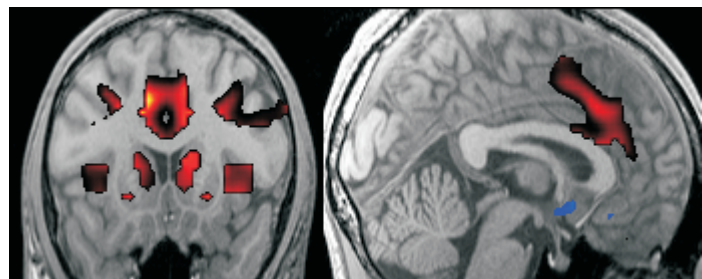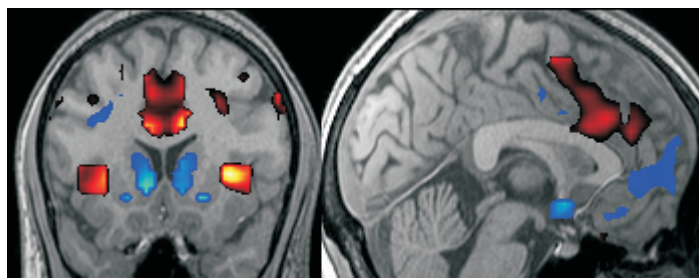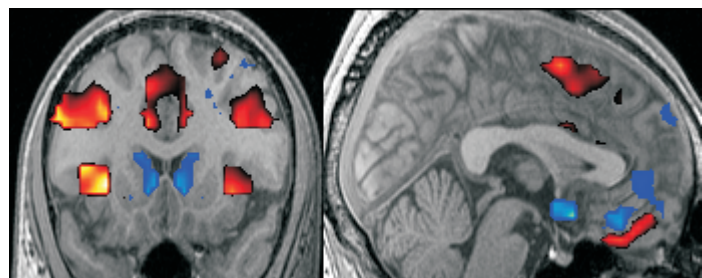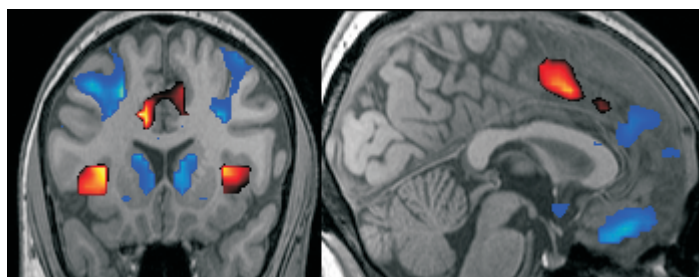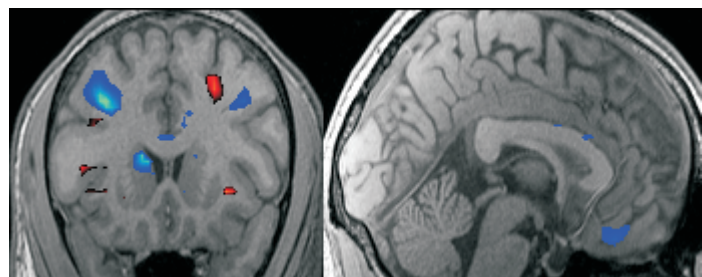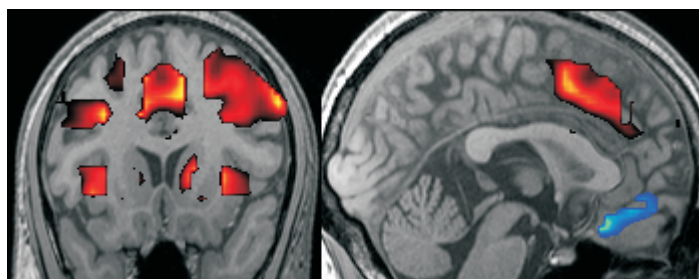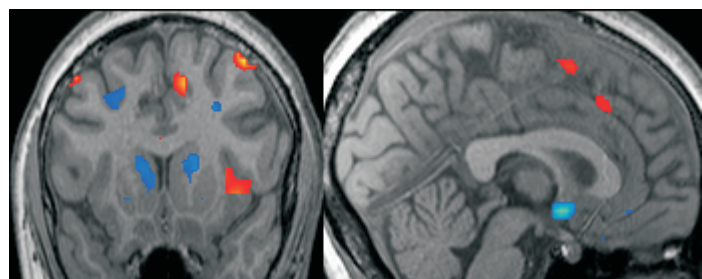

Supplement: pnas_0606297104_7.pdf [file pnas_0606297104_7.pdf]
